## Is Isolated tricuspid regurgitation different from functional tricuspid regurgitation?

J.M. Vieitez Florez<sup>1</sup>, J.M. Monteagudo<sup>1</sup>, P. Mahia<sup>2</sup>, I. Marco<sup>3</sup>, T. Gonzalez<sup>4</sup>, M. Sitges<sup>5</sup>, A. Bouzas<sup>6</sup>, V. Gonzalez<sup>7</sup>, D. Alonso<sup>8</sup>, F. Carrasco<sup>9</sup>, A. Adebá<sup>10</sup>, R. Hinojar<sup>1</sup>, C. Fernandez-Goffin<sup>1</sup>, J.L. Zamorano<sup>1</sup>

<sup>1</sup>University Hospital Ramon y Cajal de Madrid, Cardiology, Madrid, Spain; <sup>2</sup>Hospital Clinico San Carlos, Madrid, Spain; <sup>3</sup>University Hospital La Paz, Madrid, Spain; <sup>4</sup>University Hospital Vall d'Hebron, Barcelona, Spain; <sup>5</sup>Hospital Clinic de Barcelona, Barcelona, Spain; <sup>6</sup>University Hospital A Coruna, A Coruna, Spain; <sup>7</sup>Hospital de la Santa Creu i Sant Pau, Barcelona, Spain; <sup>8</sup>Hospital of Leon (Complejo Asistencial Universitario de Leon), Leon, Spain; <sup>9</sup>University Hospital Virgen de la Victoria, Malaga, Spain; <sup>10</sup>University Hospital Central de Asturias, Oviedo, Spain

On behalf of Triclip

**Funding Acknowledgement:** Type of funding source: None

**Introduction:** Isolated tricuspid regurgitation (TR) prevalence is increasing in the last decades. Its presence is associated with a worse prognosis when EROA is  $>40 \text{ mm}^2$ . Because of high surgery risk and increasing incidence, isolated TR is a challenge in modern cardiology.

**Purpose:** To evaluate the prevalence and characteristics of isolated TR compared to other TR aetiologies in a large cohort of patients.

**Methods:** Prospective study where consecutive patients undergoing an echocardiographic study within a three-month period were included. All studies with at least moderate TR were selected. Isolated TR was defined as TR with no likely pulmonary hypertension ( $>50 \text{ mmHg}$ ), no overt TR cause (no intrinsic tricuspid disease, LVEF  $\geq 50\%$ , no pacemaker/defibrillator wire across the tricuspid, no other significant valve disease, no disease that may cause TR, no congenital or pericardial heart disease); and no previous valve surgery. Patients with isolated TR and other aetiologies were compared.

**Results:** 2121 patients with at least moderate TR were included. Isolated

TR was found in 398 patients (18.8%). Basal characteristics are shown in table 1. Patients with isolated TR did not have a higher prevalence of AF (47.5% vs. 48.6%  $p=0.362$ ). Isolated TR was less severe (20.5% vs. 32.1% of patients with severe TR;  $p<0.001$ ) and less symptomatic (NYHA  $\geq \text{II}$  in 27.8% of patients vs. 69.3%;  $p<0.001$ ).

After selecting patients with at least severe TR, patients with isolated TR were also less symptomatic (NYHA  $\geq \text{II}$  in 47.8% of patients vs. 70.7%;  $p<0.001$ ) and they had better RV function (TAPSE  $<17 \text{ mm}$  in 13.4% vs. 35.6%;  $p=0.001$ ).

We found that patients with isolated severe TR had a larger tricuspid annulus diameter ( $25.4 \pm 0.8 \text{ mm/m}^2$  vs.  $24.0 \pm 0.3 \text{ mm/m}^2$ ;  $p=0.047$ ).

**Conclusions:** In this large prospective study, isolated TR is present in 18.8% of significant TR. Isolated TR was less severe, was associated with less RV dilatation (but with larger tricuspid annulus diameter) and patients had a better functional class compared to other TR aetiologies.

Table 1

|                            | Isolated TR (n=398)                    | No Isolated TR (n=1723)              | p        |
|----------------------------|----------------------------------------|--------------------------------------|----------|
| Woman                      | 250 (62.8%)                            | 1082 (63.9%)                         | 0.983    |
| Atrial fibrillation        | 197 (47.5%)                            | 812 (48.6%)                          | 0.362    |
| Age (years)                | 77.3 ( $\pm 0.5$ )                     | 77.1 ( $\pm 0.2$ )                   | 0.638    |
| Severe TR                  | 82 (20.5%)                             | 553 (32.1%)                          | $<0.001$ |
| RA area                    | $17.2 \pm 0.3 \text{ cm}^2/\text{m}^2$ | $21 \pm 0.8 \text{ cm}^2/\text{m}^2$ | $<0.001$ |
| Tricuspid annulus diameter | $25.4 \pm 0.8 \text{ mm/m}^2$          | $24.0 \pm 0.3 \text{ mm/m}^2$        | 0.047    |
| NYHA $\geq \text{II}$      | 111 (27.8%)                            | 1194 (69.3%)                         | $<0.001$ |

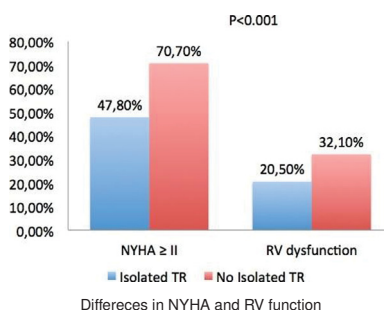

Source: http://academic.oup.com/eurheartj/article-pdf/41/Supplement_2/ehaa946.2011/34514981/ehaa946.2011.pdf
